# Supplementary material
Source: ML conference proceedings conference paper supplement (https://openreview.net/forum?id=fUeOyt-2EOp)
Supplement: supplementary_material [file attachment]

## A Appendix

In this section, we present some lemmas solved by Thor only.

**Case 1.** The lemma `cols_upt_k_insert` is from the *QR Decomposition* entry<sup>5</sup> in the AFP.

```
lemma cols_upt_k_insert:
  fixes A::"'a'^'n::{mod_type}~'m::{mod_type}"
  assumes k: "(Suc k) < ncols A"
  shows "cols_upt_k A (Suc k) = (insert (column
    (from_nat (Suc k)) A) (cols_upt_k A k))"
  unfolding cols_upt_k_def
  apply (auto)
  apply (metis Suc_lessD from_nat_mono' from_nat_to_nat_id k
    less_Suc_eq_le less_le ncols_def to_nat_le)
  by (metis from_nat_mono' k less_imp_triv
    less_or_eq_imp_le ncols_def not_less_eq order_trans)
```

Here, `cols_upt_k A (Suc k)` returns the set of columns in the matrix  $A$  up to the natural number  $k+1$ , while `ncols A` counts the number of columns in the matrix  $A$ . In short, this lemma claims that the set of columns (in a matrix  $A$ ) up to column index  $k+1$  is equivalent to that of the same matrix up to column index  $k$  inserted with the  $(k+1)^{\text{th}}$  column (of  $A$ ). This will subject to the condition that  $k+1$  is less than the number of columns in  $A$ . With Thor, the LM decided to unfold the goal with the definition of `cols_upt_k`, which is followed by an `auto` tactic to simplify the proof state. All remaining subgoals are then discharged by Sledgehammer.

**Case 2.** The lemma `size_del_max` is from the *Weight-Balanced Trees* entry<sup>6</sup> in the AFP.

```
lemma size_del_max: "t ≠ Leaf ⟹ size t = Suc(size(snd(del_max t)))"
  apply (induction t rule: del_max.induct)
  apply simp
  apply (clarsimp split: prod.splits)
  apply (smt (z3) size_rotateR size_wbt.simps(1))
  by simp
```

In this lemma,  $t$  is a weight-balanced tree, and the `size` function measures its size (as the name suggests) and `del_max` deletes the maximum node from it. Essentially, this lemma claims that when a weight-balanced its size will be reduced by one if we remove the largest node from it. For the proof, Thor intelligently performs structural induction with the induction rule `del_max.induct` and then simplifies the proof state a few times, which includes splitting products with the rule `prod.splits`. Finally, Thor concludes the remaining goals with Sledgehammer.

**Case 3.** The lemma `t_list_of_B_log_bound` is from the AFP entry named as *Priority Queues Based on Braun Trees*.<sup>7</sup>

```
lemma t_list_of_B_log_bound:
  "braun t ⟹ t_list_of_B t ≤ 3 * (nlog2 (size t + 1) + 1) * size t"
  apply (induction t rule: measure_induct_rule[where f=size])
  apply (case_tac x)
  apply simp
  using braun.simps(1) t_list_of_B_braun_simps(1) apply blast
  by (metis acomplete_if_braun height_acomplete order_refl
    size1_size t_list_of_B_induct)
```

Here, `size` measures the size of a Braun tree; `nlog2` stands for the function  $\lambda x. \lceil \log_2(x) \rceil$ ; `t_list_of_B` is another measure of a Braun tree. Basically, this lemma describes the relationship between a normal tree size and a Braun-tree specific measure. The proof starts with an intelligent structural induction, progresses with case analysis, and is concluded with Sledgehammer on each of the remaining subgoals.

<sup>5</sup>QR\_Decomposition/Gram\_Schmidt.thy

<sup>6</sup>Weight\_Balanced\_Trees/Weight\_Balanced\_Trees.thy

<sup>7</sup>Priority\_Queue\_Braun/Sorting\_Braun.thy

**Case 4.** The lemma `inj_imp_Ker0` is from the AFP entry named as *Matrices, Jordan Normal Forms, and Spectral Radius Theory*.<sup>8</sup>

```
lemma inj_imp_Ker0:
  assumes "inj_on T (carrier V)"
  shows "carrier (V.vs kerT) = {0_V}"
  apply (rule equalityI)
  apply (rule subsetI)
  apply (unfold ker_def, auto)
  by (metis V.module.M.zero_closed assms f0_is_0 inj_on_contraD)
```

Here,  $T$  is a linear map between two vector spaces. The lemma claims that if the  $T$  is injective on the carrier set of the space  $V$ , the kernel of  $T$  has to be a singleton set with the zero in  $V$ . In this proof, Thor naturally performs a sequence of introduction steps by applying the lemma `equalityI` and `subsetI`, before unfolds the definition of a kernel (i.e., `ker_def`) and uses `auto` to simplify the proof state. The final remaining goal is closed with Sledgehammer.

---

<sup>8</sup>Jordan\_Normal\_Form/Missing\_VectorSpace.thy
